# Supplementary material
Source: Springer Nature journal article supplement (http://www.springermedizin.de/resource/supplementary/12888_2009_673_MOESM4_ESM.pdf/9478122)

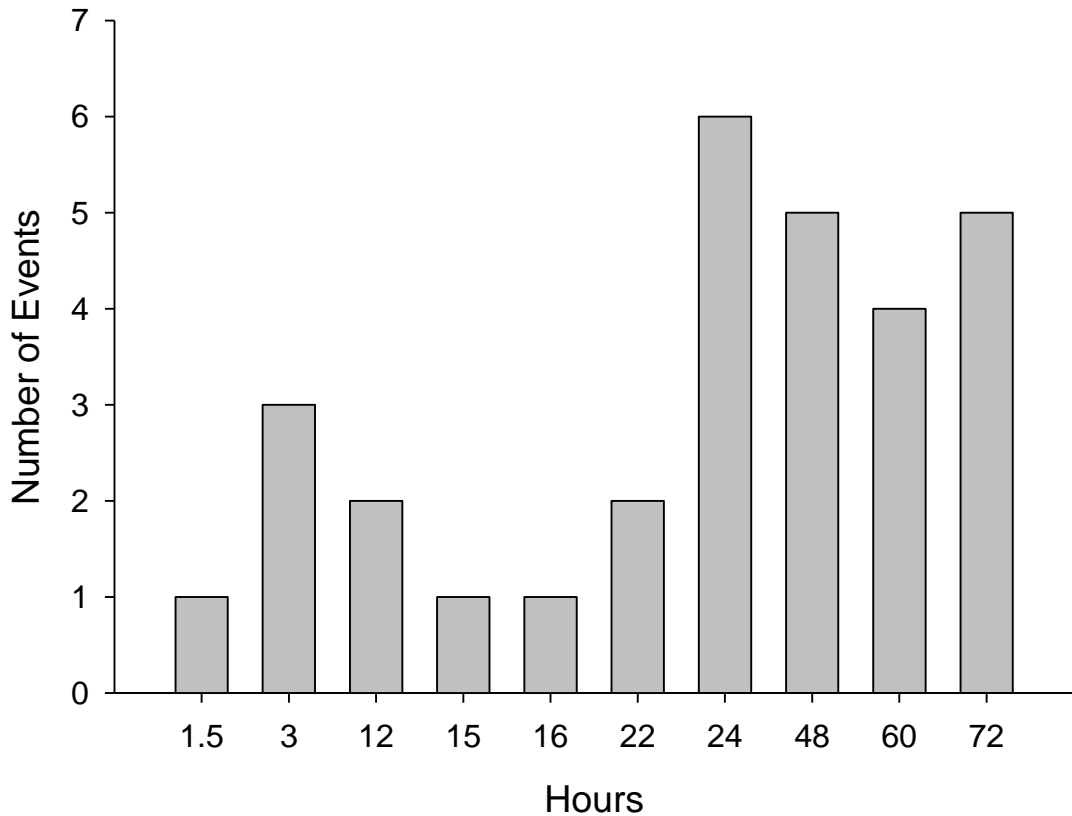

Supplement: MOESM4 [file 9478122]
